# Supplementary material
Source: PubMed Central journal article supplement (PMC10239666)
Supplement: NIHMS1896077-supplement-Suppl_Tbl_1.pdf [file NIHMS1896077-supplement-Suppl_Tbl_1.pdf]

Supplementary table 1. ICD-9 codes used to define diagnoses and conditions.

|                            | ICD-9 code                                                |
|----------------------------|-----------------------------------------------------------|
| Ascites                    | 789.59                                                    |
| Cirrhosis                  | 571.2, 571.5, 571.6                                       |
| uHepatitis C               | 070.41, 070.44, 070.51, 070.54, 070.70,<br>070.71, v02.62 |
| Hepatitis B                | 070.22, 070.23, 070.32, 070.33, 070.2,<br>070.3, V02.6    |
| Hepatic encephalopathy     | 572.2                                                     |
| Hepatocellular Carcinoma   | 155.0                                                     |
| Hepato-renal syndrome      | 572.4                                                     |
| Liver Transplant procedure | 50.51, 50.59                                              |
| Variceal bleeding          | 456.0, 456.20.                                            |
