# Supplementary material
Source: PubMed Central journal article supplement (PMC10239666)
Supplement: NIHMS1896077-supplement-Suppl_Tbl_2.pdf [file NIHMS1896077-supplement-Suppl_Tbl_2.pdf]

Supplementary table 2. Comparison between patients with and without comprehensive laboratory records.

|                                    | With comprehensive<br>laboratory works<br>(n=5,795) | Without<br>comprehensive<br>laboratory works<br>(n=129,262) | p      |
|------------------------------------|-----------------------------------------------------|-------------------------------------------------------------|--------|
| Age (years; mean/median, IQR)      | 57.6/58 (16)                                        | 58.4/58 (18)                                                | <0.001 |
| Male (%)                           | 55.1                                                | 54.8                                                        | 0.534  |
| White (%)                          | 65                                                  | 69                                                          | <0.001 |
| <b>Etiology of liver disease</b>   |                                                     |                                                             |        |
| Alcoholic liver disease (%)        | 20                                                  | 24                                                          | <0.001 |
| Alpha-1-antitrypsin deficiency (%) | 0.56                                                | 0.27                                                        | 0.002  |
| Autoimmune hepatitis (%)           | 4.2                                                 | 2.3                                                         | <0.001 |
| Hemochromatosis (%)                | 3                                                   | 1.7                                                         | <0.001 |
| Hepatitis B (%)                    | 9                                                   | 6                                                           | <0.001 |
| Hepatitis C (%)                    | 45                                                  | 30                                                          | <0.001 |
| NAFLD (%)                          | 23                                                  | 32                                                          | <0.001 |
| Primary biliary cholangitis (%)    | 11.4                                                | 11.6                                                        | 0.527  |
| Primary sclerosing cholangitis (%) | 3.6                                                 | 3.5                                                         | 0.624  |
| Wilson's disease (%)               | 0.29                                                | 0.26                                                        | 0.66   |
| <b>Comorbidity</b>                 |                                                     |                                                             |        |
| Diabetes mellitus (%)              | 44                                                  | 43                                                          | 0.118  |
| Morbid obesity (%)                 | 12                                                  | 9                                                           | <0.001 |
