# Supplementary material
Source: PubMed Central journal article supplement (PMC10239666)
Supplement: NIHMS1896077-supplement-Suppl_Tbl_3.pdf [file NIHMS1896077-supplement-Suppl_Tbl_3.pdf]

Supplementary table 3. Exclusion codes used for NAFLD diagnosis.

---

| Exclusion codes used for NAFLD diagnosis                                                                              |
|-----------------------------------------------------------------------------------------------------------------------|
| 070.0 viral hepatitis A with hepatic coma                                                                             |
| 070.1 viral hepatitis A without hepatic coma                                                                          |
| 070.20 viral hepatitis B with hepatic coma acute or unspecified without hepatitis delta                               |
| 070.21 viral hepatitis B with hepatic coma acute or unspecified with hepatitis delta                                  |
| 070.22 chronic viral hepatitis B with hepatic coma without hepatitis delta                                            |
| 070.23 chronic viral hepatitis B with hepatic coma with hepatitis delta                                               |
| 070.30 viral hepatitis B without hepatic coma acute or unspecified without hepatitis delta                            |
| 070.31 viral hepatitis B with hepatic coma acute or unspecified with hepatitis delta                                  |
| 070.32 chronic viral hepatitis B without hepatic coma without hepatitis delta                                         |
| 070.33 chronic viral hepatitis B without hepatic coma with hepatitis delta                                            |
| 070.41 acute hepatitis C with hepatic coma                                                                            |
| 070.42 hepatitis delta without active hepatitis B with hepatic coma hepatitis delta with<br>hepatitis B carrier state |
| 070.43 hepatitis E with hepatic coma                                                                                  |
| 070.44 chronic hepatitis C with hepatic coma                                                                          |
| 070.49 other specified viral hepatitis with hepatic coma                                                              |
| 070.51 acute hepatitis C without mention of hepatic coma                                                              |
| 070.52 hepatitis delta without active hepatitis B disease or hepatic coma                                             |
| 070.53 hepatitis E without hepatic coma                                                                               |
| 070.54 chronic hepatitis C without hepatic coma                                                                       |

---

---

070.59 other specified viral hepatitis without hepatic coma

070.6 unspecified viral hepatitis with hepatic coma

070.70 unspecified viral hepatitis C without hepatic coma

070.71 unspecified viral hepatitis C with hepatic coma

070.9 unspecified viral hepatitis without hepatic coma

V02.60 carrier or suspected carrier of viral hepatitis unspecified

V02.61 carrier or suspected carrier of hepatitis B

V02.62 carrier or suspected carrier of hepatitis C

V02.69 carrier or suspected carrier of other viral hepatitis

571.40 chronic hepatitis unspecified

571.41 chronic persistent hepatitis

571.42 autoimmune hepatitis

571.49 chronic hepatitis

573.1 hepatitis in viral diseases classified elsewhere

573.2 hepatitis in other infectious diseases classified elsewhere

571.0 alcoholic fatty liver disease

571.1 acute alcoholic hepatitis

571.2 alcoholic cirrhosis of liver

571.3 alcoholic liver damage

571.6 biliary cirrhosis

---
