# Supplementary material
Source: PubMed Central journal article supplement (PMC10239666)
Supplement: NIHMS1896077-supplement-Suppl_Tbl_4.pdf [file NIHMS1896077-supplement-Suppl_Tbl_4.pdf]

Supplementary table 4. Formula of seven non-invasive liver reserve models.

| Liver reserve models | Formula                                                                                                                                                                                                                       |
|----------------------|-------------------------------------------------------------------------------------------------------------------------------------------------------------------------------------------------------------------------------|
| ALBI                 | $\text{Log}(\text{Bilirubin } [\mu\text{mol/L}]) * 0.66 + (\text{Albumin } [\text{g/L}] * -0.085)$                                                                                                                            |
| ALBI-FIB-4           | $\text{ALBI score} * 1.331 + \text{FIB-4 score} * 0.15$                                                                                                                                                                       |
| APRI                 | $([\text{AST}/\text{upper limit of normal}] / \text{platelet count } (10^9/\text{L})) * 100$                                                                                                                                  |
| CTP                  | Bilirubin(mg/dL): <2 = 1, 2–3 = 2, >3 = 3; Albumin(g/dL): >3.5 = 1, 2.8–3.5 = 2, <2.8 = 3; PT sec (INR): <4 (<1.7) = 1, 4–6 (1.7–2.3) = 2, >6 (>2.3) = 3; Ascites: none=1; Encephalopathy: none=1.                            |
| FIB-4                | $(\text{Age}[\text{years}] * \text{AST}[\text{U/L}]) / (\text{platelet } [10^9/\text{L}] * \text{ALT}[\text{U/L}]^{1/2})$                                                                                                     |
| Lok's index          | $\text{Lok's Index} = e^{(\text{LogOdds})} / (1 + e^{(\text{LogOdds})}); \text{Log Odds} = (1.26 * \text{AST}[\text{U/L}] / \text{ALT}[\text{U/L}]) + (5.27 * \text{INR}) - (0.0089 * \text{Platelet}[10^9/\text{L}]) - 5.56$ |
| MELD                 | $10 * ((0.957 * \ln(\text{Creatinine})) + (0.378 * \ln(\text{Bilirubin})) + (1.12 * \ln(\text{INR}))) + 6.43$                                                                                                                 |
